# Supplementary material for: MUM ENHANCERS are important for seed coat mucilage production and mucilage secretory cell differentiation in Arabidopsis thaliana
Source: PubMed Central journal article supplement — J Exp Bot. 2009 Apr 28;60(9):2601–12. doi: 10.1093/jxb/erp102 (PMC2692007; doi:10.1093/jxb/erp102), 2009-04-28
Supplement: erp102_1.pdf [file erp102_1.pdf]

***MUM ENHANCERS* are important for seed coat mucilage production  
and mucilage secretory cell differentiation in *Arabidopsis thaliana***

Andrej A. Arsovski, Maria M. Villota, Owen Rowland, Rajagopal Subramaniam, Tamara

L. Western

**Table S1.** Primers used for the sequencing of mum2-13 and myb61-6.

| <b>Primer Name</b> | <b>Sequence (5' → 3')</b> |
|--------------------|---------------------------|
| mum2 p327F         | AGCTTCTCTTCTCCGGTTCC      |
| mum2 p2302R        | ATCACATCGATGCCTCCTTC      |
| mum2 p1874F        | CACAGATCCGTTGTCTGTGC      |
| mum2 p3741R        | GCGTGAAGCTCCTTCAAATG      |
| mum2 p3740F        | GCTGCGATAAAATCCTCTGC      |
| mum2 p5586R        | ACCCCAATTACCCAAAAAC       |
| mum2 p844F         | TTTTCGCCAAAAATGAAAAA      |
| mum2 p955R         | TGATCCCCGCTAGAATTTTG      |
| mum2 p2694F        | ATACCGAACCGACAATGAGC      |
| mum2 p2865R        | TTCGGTTTGGTGACATTGAA      |
| mum2 p3808R        | CATTGGTCCCAAGGAGAGAA      |
| mum2 p4482F        | TTGACGGTCCATTGCACTTA      |
| mum2 p4622R        | TGTCTCTGCTTCCATGTCCA      |
| myb61 p59F         | CATTCTCTCTGCTCACAACTTTT   |
| myb61 p1715R       | TGCAAAAGAAAGAAGAATCTTTGA  |
| myb61 p804F        | CACACAAGCCCATCTCTGAA      |
| myb61 p942R        | GGCCTTTCGAGGAAGAAGTC      |
